# Supplementary material
Source: publisher site journal article supplement (https://www.dovepress.com/get_supplementary_file.php?f=423388.docx)
Supplement: Supplementary file 1 [file get_supplementary_file.php]

**Supply Table 1 Effects of LWLB Granules on blood glucose(FBG) in mice**

| Groups | Administration cycle | | | | | | | | | | | |
| --- | --- | --- | --- | --- | --- | --- | --- | --- | --- | --- | --- | --- |
| 1 weeks | 2 weeks | 3 weeks | 4 weeks | 5 weeks | 6 weeks | 7 weeks | 8 weeks | 9 weeks | 10 weeks | 11 weeks | 12 weeks |
| Control | 8.8±1.2 | 7.3±1.6 | 5.5±1.2 | 5.8±1.1 | 8.2±1.3 | 8.3±1.8 | 6.7±0.8 | 7.9±1.2 | 6.7±1.4 | 6.9±1.8 | 7.3±1.3 | 9.5±1.1 |
| DPN | 24.3±5.0## | 25.5±4.8## | 25.5±4.5## | 26.5±3.7## | 29.9±2.9## | 32.4±0.9## | 28.0±2.9## | 30.1±2.9## | 29.4±3.4## | 32.4±0.9## | 31.0±2.5## | 30.4±2.8## |
| MD | 22.8±3.8 | 24.8±4.2 | 26.5±4.4 | 28.7±3.9 | 27.3±4.8 | 31.6±1.9 | 28.1±4.3 | 25.8±4.1 | 27.6±7.1 | 31.3±3.1 | 30.2±3.4 | 30.8±4.2 |
| Epa | 22.2±5.7 | 25.6±5.1 | 23.5±5.3 | 24.3±4.9 | 28.3±6.1 | 25.2±5.3** | 25.5±5.3 | 27.2±5.0 | 28.9±6.3 | 28.8±5.4* | 27.5±4.0* | 29.7±5.9 |
| LW-l | 22.6±4.8 | 27.0±3.7 | 25.5±3.5 | 30.1±4.0** | 30.8±3.0 | 27.7±2.4** | 26.5±3.7 | 30.1±2.5 | 30.6±2.7 | 31.5±3.9 | 31.1±2.3 | 30.7±3.6 |
| LW-m | 24.7±4.6 | 26.9±3.5 | 24.9±4.6 | 31.4±2.6** | 29.5±5.0 | 29.0±3.4** | 26.1±3.5 | 29.5±3.1 | 28.7±2.1 | 30.9±1.7* | 32.5±0.8 | 31.9±1.6 |
| LW-h | 24.5±5.4 | 27.0±4.5 | 24.1±5.1 | 31.2±2.8** | 29.4±3.8 | 28.3±2.8** | 24.0±4.3* | 29.8±2.9 | 26.6±4.8 | 29.4±4.9 | 31.2±3.2 | 28.2±6.2 |

Data are expressed as mean±SD. *##P*＜0.01, when compared with the control group; **P*＜0.05 and ***P*＜0.01, when compared with the DPN group.

**Supply Table 2 Effect of LWLB Granules on Body Weight in mice（）**

| Groups | Administration cycle | | | | | | | | | | | | |
| --- | --- | --- | --- | --- | --- | --- | --- | --- | --- | --- | --- | --- | --- |
| 0 week | 1 weeks | 2 weeks | 3 weeks | 4 weeks | 5 weeks | 6 weeks | 7 weeks | 8 weeks | 9 weeks | 10 weeks | 11 weeks | 12 weeks |
| Control | 25.9±2.1 | 27.4±1.9 | 27.3±1.8 | 27.2±1.8 | 28.2±2.0 | 29.7±2.0 | 29.5±1.8 | 29.6±1.8 | 29.5±2.0 | 28.9±2.0 | 29.3±1.9 | 30.3±1.8 | 30.9±2.1 |
| DPN | 46.4±2.2## | 48.1±2.1## | 50.3±2.8## | 50.8±3.5## | 52.2±4.2## | 53.3±2.9## | 52.6±2.8## | 51.3±3.3## | 49.8±3.8## | 47.6±3.6## | 46.6±3.8## | 44.9±4.7## | 44.4±5.0## |
| MD | 46.2±1.6 | 47.9±1.6 | 49.4±2.2 | 49.5±2.2 | 50.0±3.3* | 52.6±4.5 | 51.0±5.0 | 49.4±6.0 | 47.7±6.7 | 45.3±7.3 | 43.0±8.3 | 41.0±8.5 | 39.4±9.7 |
| Epa | 45.8±2.7 | 47.5±3.0 | 49.0±3.6 | 48.9±3.9 | 49.9±4.5 | 51.0±4.9 | 50.1±4.8 | 50.1±4.9 | 48.8±5.3 | 47.1±6.3 | 45.7±6.9 | 45.0±7.5 | 44.6±8.6 |
| LW-l | 46.9±1.9 | 48.1±1.7 | 50.2±1.9 | 50.5±2.2 | 51.0±2.7 | 51.7±3.6 | 50.6±3.5 | 49.5±3.5 | 47.8±4.7 | 46.1±5.3 | 43.6±5.5 | 42.3±5.5 | 41.5±6.8 |
| LW-m | 46.4±2.2 | 48.1±2.2 | 49.9±2.4 | 50.1±3.1 | 50.3±3.1 | 51.3±3.1 | 50.5±3.4 | 50.2±3.9 | 48.6±4.4 | 48.0±3.3 | 46.5±3.6 | 45.5±4.2 | 44.8±4.8 |
| LW-h | 46.2±1.4 | 47.2±1.7 | 48.9±1.9 | 49.3±2.4 | 49.4±2.8** | 50.0±2.9* | 49.2±3.0 | 48.2±3.2 | 46.2±3.9 | 45.1±2.7 | 44.8±4.3 | 43.4±4.9 | 41.9±7.1 |

Data are expressed as mean±SD. *##P*＜0.01, when compared with the control group; **P*＜0.05 and ***P*＜0.01, when compared with the DPN group

**Supply Table 3 Effect of LWLB Granules on Mechanical pain thresholds in mice（）**

| Administration cycle | Groups | | | | | | |
| --- | --- | --- | --- | --- | --- | --- | --- |
| Control | DPN | MD | Epa | LW-l | LW-m | LW-h |
| 0 week | 650.910±90.834 | 850.590±106.648 | - |  | - | - | - |
| 4 weeks | 614.7±54.1 | 855.3±94.1## | 814.3±84.1 | 814.2±73.0 | 821.9±74.5 | 820.0±67.4 | 823.3±72.4 |
| 6 weeks | 599.0±129.6 | 869.9±127.2## | 829.4±107.0 | 825.8±88.3 | 816.8±66.2 | 821.9±90.4 | 822.3±95.0 |
| 8 weeks | 575.4±106.5 | 832.3±80.7## | 800.5±83.3 | 794.5±75.7 | 798.8±74.9 | 802.6±40.6 | 782.2±139.1 |
| 10 weeks | 569.2±145.8 | 878.6±131.4# | 676.3±7.6 | 681.3±11.4 | 682.8±12.9 | 673.4±21.0 | 675.3±27.6 |
| 12 weeks | 588.6±141.4 | 840.9±66.7## | 652.0±104.6** | 640.0±69.1** | 641.9±74.1** | 609.2±39.7** | 649.2±26.5** |

Data are expressed as mean±SD. *##P*＜0.01 and *#P*＜0.05, when compared with the control group; ***P*＜0.01, when compared with the DPN group.

**Supply Table 4 Effect of LWLB Granules on MCV in mice（）**

| Administration cycle | Groups | | | | | | |
| --- | --- | --- | --- | --- | --- | --- | --- |
| Control | DPN | MD | Epa | LW-l | LW-m | LW-h |
| 0 week | 68.10±3.90 | 20.14±0.21 | - | - | - | - | - |
| 4 weeks | 73.41±17.18 | 23.64±5.26# | 50.48±15.68* | 43.67±8.13 | 31.19±3.74 | 42.94±20.46 | 39.85±18.75 |
| 6 weeks | 73.41±17.18 | 23.64±4.70# | 50.48±13.58** | 43.67±6.94** | 31.19±3.16** | 42.94±17.19* | 39.85±15.69** |
| 12 weeks | 74.31±14.56 | 28.76±6.61## | 67.32±15.28** | 73.55±13.06** | 52.45±21.04** | 68.69±14.57** | 71.39±11.16** |

Data are expressed as mean±SD. *##P*＜0.01 and *#P*＜0.05, when compared with the control group; **P*＜0.05 and ***P*＜0.01, when compared with the DPN group.

**Supply Table 5 Effect of LWLB Granules on SCV in mice（）**

| Administration cycle | Groups | | | | | | |
| --- | --- | --- | --- | --- | --- | --- | --- |
| Control | DPN | MD | Epa | LW-l | LW-m | LW-h |
| 0 week | 55.30±28.82 | 18.99±1.47 | - | - | - | - | - |
| 4 weeks | 66.67±8.45 | 26.10±7.80## | 38.00±14.20 | 35.22±3.51 | 21.03±6.06 | 45.21±16.44 | 54.84±30.39* |
| 6 weeks | 66.67±8.45 | 26.10±6.98# | 38.00±12.30 | 35.22±2.65* | 21.03±5.12 | 45.21±13.81** | 54.84±25.43* |
| 12 weeks | 70.00±12.75 | 26.07±4.14## | 55.02±12.62** | 61.44±14.85** | 42.53±15.22** | 66.47±13.76** | 61.45±16.52** |

Data are expressed as mean±SD. *##P*＜0.01 and *#P*＜0.05, when compared with the control group; **P*＜0.05 and ***P*＜0.01, when compared with the DPN group.

**Supply Table 6 Effect of LWLB Granules on Pathological Organization of the sciatic nerves in Mice（）**

| Administration cycle | Groups | | | | | | |
| --- | --- | --- | --- | --- | --- | --- | --- |
| Control | DPN | MD | Epa | LW-l | LW-m | LW-h |
| 4 weeks | 0.5±0.7 | 3.5±2.1 | 1.3±1.2 | 1.0±1.4 | 1.3±1.2 | 0.7±0.6 | 1.0±0.0 |
| 8 weeks | 1.3±0.6 | 3.7±1.2# | 0.7±1.2* | 1.0±0.0* | 1.0±0.0* | 2.0±0.0* | 1.0±1.0* |
| 12 weeks | 0.9±0.3 | 2.2±1.6## | 0.9±0.6* | 1.0±0.7* | 0.9±0.5** | 0.8±0.6** | 1.0±0.5* |

Data are expressed as mean±SD. *##P*＜0.01 and *#P*＜0.05, when compared with the control group; **P*＜0.05 and ***P*＜0.01, when compared with the DPN group.

**Supply Table 7 Effect of LWLB Granules on Pathological Organization of the caudal nerves in Mice（）**

| Administration cycle | Groups | | | | | | |
| --- | --- | --- | --- | --- | --- | --- | --- |
| Control | DPN | MD | Epa | LW-l | LW-m | LW-h |
| 4 weeks | 1.7±0.6 | 1.3±0.6 | 2.0±0.0 | 1.7±0.6 | 1.7±0.6 | 1.7±0.6 | 1.3±0.6 |
| 8 weeks | 1.3±0.6 | 2.3±0.6 | 1.7±0.6 | 1.7±0.6 | 2.0±0.0 | 1.7±0.6 | 3.3±2.5 |
| 12 weeks | 1.1±0.3 | 2.0±0.4## | 1.1±0.3** | 1.5±1.7** | 1.3±0.6** | 1.2±0.4** | 1.1±0.6** |

Data are expressed as mean±SD. *##P*＜0.01, when compared with the control group; ***P*＜0.01, when compared with the DPN group.

**Supply Table 8 The RT and RSD values of the peak area of the six ions randomly extracted under the Agela Venusil HILIC system**

| m/z | RT/min | RSD/% | Peak area | RSD/% | Ion |
| --- | --- | --- | --- | --- | --- |
| 178.0483 | 2.513 | 0.026 | 283.332 | 8.196 | M+H |
| 226.2916 | 5.881 | 0.032 | 6923.755 | 3.252 | M+H |
| 512.3434 | 9.026 | 0.021 | 154565.626 | 6.518 | M+H |
| 231.2569 | 13.138 | 0.018 | 21896.231 | 3.159 | M+H |
| 795.2615 | 18.154 | 0.002 | 94121.015 | 4.891 | M+H |
| 169.9459 | 24.205 | 0.066 | 21984.051 | 9.519 | M+H |

**Supply Table 9 The potential biomarkers related to MD, Epa and LWLB after compared with DPN group**

| Groups | Cycle | numbers | Biomarkers (VIP＞1 and P＜0.05) |
| --- | --- | --- | --- |
| Con vs DPN | 4w | 107 | N-Acetyl-L-phenylalanine, Phloretin,Creatinine, D-Ribose 5-phosphate, MNa, Alpha-Linolenic acid, N-Acetyl-L-alanine, 3-Methyladenine, Urocanic acid, 3-Hydroxybenzoic acid, 2-Ethyl-2-Hydroxybutyric acid, L-Carnitine, Loratadine, Fructose 6-phosphate, Adenosine monophosphate, 3-Indolepropionic acid, Quercetin, Mannose 6-phosphate, Bilirubin, Oxoadipic acid, Citrulline, Cytidine triphosphate, Salicylic acid, L-Serine, Melibiose, Elaidic acid, MNH4, L-Tyrosine, DL-2-Aminooctanoic acid, L-Malic acid, Taurine, 6-Methyladenine, D-Ribose 5-phosphate, 2-Amino-3-phosphonopropionic acid, Pantothenic acid, Diaminopimelic acid, Glucose 6-phosphate, Clotrimazole, Succinylacetone, MNH4, Normetanephrine, Lipoamide, Ranitidine, Cellobiose, Testosterone, Glycyl-L-leucine, Capric acid, 5-Methoxytryptophan, 1-Methyladenosine, L-Glutamic acid, Epinephrine, 2-Deoxyguanosine 5-monophosphate, Mannose 6-phosphate, MNa, 2-Hydroxycaproic acid, Glycine, Oxoglutaric acid, Androstanedione, MNH4, Uridine 5-monophosphate, Creatine, Aspartame, Canrenone, Ureidosuccinic acid, Dehydroepiandrosterone, Tyramine, Sucrose, Vaccenic acid, Succinylacetone, L-Arginine, Trimethylamine, Turanose, Imidazoleacetic acid, 2-Hydroxyphenethylamine, 2-Furoic acid, 3-Methylindole, Suberic acid, 4-Hydroxybenzoic acid, 1,3-Dimethyluracil, N-Acetyl-L-methionine, Homocitrulline, Thymine, Cortisone, N-Methylnicotinamide, Adenine, Leucinic acid, Cortexolone, Trehalose, Trimethylamine N-oxide, Alpha-Lactose, Guanosine monophosphate, Lactulose, Malic acid, 5-Hydroxylysine, Corticosterone, Oleic acid, Indoleacrylic acid, Erythritol, Niacinamide, 3-Methoxytyrosine,cis, cis-Muconic acid,3,4,5-Trimethoxycinnamic acid, D-Arginine, 4-Hydroxyproline, N-Alpha-acetyllysine, o-Tyrosine, Elaidic acid, Isomaltose, Glucose 1-phosphate, Androstanedione, 5-Aminolevulinic acid, L-Methionine |
| 6w | 21 | L-Isoleucine, L-Alloisoleucine, Inosinic acid, Indoxyl, Beta-Leucine, L-Aspartyl-L-phenylalanine, Xanthosine, Glutathione, Lipoamide, L-Leucine, 4-Guanidinobutanoic acid, Aminocaproic acid, Pyridoxine, Trimethylamine N-oxide, L-Norleucine, Taurocholic acid, 6-Hydroxydopamine, L-Acetylcarnitine, Erythritol, 3-Methoxytyrosine, Verapamil |
| 12w | 107 | N-Acetyl-L-phenylalanine, Phloretin, Creatinine, D-Ribose 5-phosphate, MNa, Alpha-Linolenic acid, N-Acetyl-L-alanine, 3-Methyladenine, Urocanic acid, 3-Hydroxybenzoic acid, 2-Ethyl-2-Hydroxybutyric acid, L-Carnitine, Loratadine, Fructose 6-phosphate, Adenosine monophosphate, 3-Indolepropionic acid, Quercetin, Mannose 6-phosphate, Bilirubin, Oxoadipic acid, Citrulline, Cytidine triphosphate, Salicylic acid, L-Serine, Melibiose, Elaidic acid, MNH4, L-Tyrosine, DL-2-Aminooctanoic acid, L-Malic acid, Taurine, 6-Methyladenine, D-Ribose 5-phosphate, 2-Amino-3-phosphonopropionic acid, Pantothenic acid, Diaminopimelic acid, Glucose 6-phosphate, Clotrimazole, Succinylacetone, MNH4, Normetanephrine, Lipoamide, Ranitidine, Cellobiose, Testosterone, Glycyl-L-leucine, Capric acid, 5-Methoxytryptophan, 1-Methyladenosine, L-Glutamic acid, Epinephrine, 2-Deoxyguanosine 5-monophosphate, Mannose 6-phosphate, MNa, 2-Hydroxycaproic acid, Glycine, Oxoglutaric acid, Androstanedione, MNH4, Uridine 5-monophosphate, Creatine, Aspartame, Canrenone, Ureidosuccinic acid, Dehydroepiandrosterone, Tyramine, Sucrose, Vaccenic acid, Succinylacetone, L-Arginine, Trimethylamine, Turanose, Imidazoleacetic acid, 2-Hydroxyphenethylamine, 2-Furoic acid, 3-Methylindole, Suberic acid, 4-Hydroxybenzoic acid, 1,3-Dimethyluracil, N-Acetyl-L-methionine, Homocitrulline, Thymine, Cortisone, N-Methylnicotinamide, Adenine, Leucinic acid, Cortexolone, Trehalose, Trimethylamine N-oxide, Alpha-Lactose, Guanosine monophosphate, Lactulose, Malic acid, 5-Hydroxylysine, Corticosterone, Oleic acid, Indoleacrylic acid, Erythritol, Niacinamide, 3-Methoxytyrosine, cis,cis-Muconic acid, 3,4,5-Trimethoxycinnamic acid, D-Arginine, 4-Hydroxyproline, N-Alpha-acetyllysine, o-Tyrosine, Elaidic acid, Isomaltose, Glucose 1-phosphate, Androstanedione, 5-Aminolevulinic acid, L-Methionine |
| MD vs DPN | 4w | 72 | Dimethylmalonic acid, Erucic acid, 2-Aminobenzoic acid, Alpha-Linolenic acid, m-Aminobenzoic acid, N-Acetyl-L-alanine, Glycerophosphocholine, L-Threonine, L-Homoserine, Methylsuccinic acid, Adenosine monophosphate, Fructose 6-phosphate, Mannose 6-phosphate, Indolelactic acid, MNH4, dGTP, 2-Isopropylmalic acid, MNH4, 3-Aminosalicylic acid, DL-2-Aminooctanoic acid, Dihydrouracil, Taurine, Carnosine, Pipecolic acid, 2-Amino-3-phosphonopropionic acid, Xanthosine, Glucose 6-phosphate, Allantoic acid, 3-Pyridylacetic acid, N-Methyl-a-aminoisobutyric acid, Phthalic acid, Monoethyl malonic acid, Urea, Capric acid, Glutaric acid, N-Methylhydantoin, 2-Phenylaminoadenosine, L-Glutamic acid, Trigonelline, Traumatic acid, Octadecanedioic acid, 5-Aminopentanoic acid, 2-Deoxyguanosine 5-monophosphate, Ribothymidine, Mannose 6-phosphate, MNa, Maltitol, 7-Ketocholesterol, FAPy-adenine, Indolelactic acid, Glycerol 3-phosphate, Allantoic acid, MNa, Deoxyinosine, Uridine 5-monophosphate, L-Valine, Canrenone, Ureidosuccinic acid, L-Arginine, Benzamide, 2-Furoic acid, Suberic acid, Homocitrulline, 2-Isopropylmalic acid, N-Methylnicotinamide, Adenine, Taurocholic acid, 5-Phenylvaleric acid, Deoxyadenosine monophosphate, p-Aminobenzoic acid, L-Acetylcarnitine, D-Arginine, 4-Hydroxyproline, Adenosine triphosphate, Glucose 1-phosphate, 5-Aminolevulinic acid |
| 6w | 107 | N-Acetyl-L-phenylalanine, Dehydroascorbic acid, 2,5-Furandicarboxylic acid, 3-Hexenedioic acid, Mandelic acid, N-Acetylglutamic acid, D-Ribose 5-phosphate, MNa, Pyridoxamine, 2-Aminobenzoic acid, Alpha-Linolenic acid, m-Aminobenzoic acid, Glycerophosphocholine, L-Threonine, Deoxyguanosine, L-Carnitine, L-Homoserine, Homogentisic acid, Ornithine, Adenosine monophosphate, Allantoin, 3-Indolepropionic acid, Citrulline, Oxoadipic acid, L-Proline, Cytidine triphosphate, 3-Methoxybenzenepropanoic acid, Taurine, L-Cystathionine, D-Ribose 5-phosphate, Pipecolic acid, 2-Amino-3-phosphonopropionic acid, L-Lysine, 2-Phenylglycine, Clotrimazole, 2-Hydroxy-2-methylbutyric acid, trans-Aconitic acid, Mevalonic acid, 5-Thymidylic acid, Glutathione, 3-Pyridylacetic acid, Hydroxyphenyllactic acid, N-Methyl-a-aminoisobutyric acid, Acetaminophen, Guaifenesin, Melatonin, Glycyl-L-leucine, Capric acid, Urea, Pregnenolone sulfate, MNH4, Cytosine, 2-Phenylaminoadenosine, 3-Nitrotyrosine, 3b-Hydroxy-5-cholenoic acid, Trigonelline, Octadecanedioic acid, Homo-L-arginine, Traumatic acid, 2-Deoxyguanosine 5-monophosphate, 3,4-Dihydroxybenzeneacetic acid, 5-Aminopentanoic acid, 4-Guanidinobutanoic acid, 3,4-Dihydroxymandelic acid, Gamma-Caprolactone, D-Lysine, Aminoadipic acid, L-Valine, Canrenone, Betaine, 5-Methoxytryptamine, 4-Hydroxy-3-methylbenzoic acid, L-Arginine, Imidazoleacetic acid, L-Histidine, Suberic acid, 1,3-Dimethyluracil, Homovanillic acid, All-trans-retinoic acid, Thymine, Tryptophanol, Adenosine, 1,1-Dimethylbiguanide, Pyridoxine, p-Anisic acid, 13-cis-Retinoic acid, Cortexolone, Trimethylamine N-oxide, Deoxyuridine, 6-Hydroxydopamine, 5-Methoxysalicylic acid, Vanillic acid, p-Aminobenzoic acid, Corticosterone, 1-Methylhistidine, 3-Methylhistidine, Erythritol, Indoleacrylic acid, Atenolol, Pimelic acid, Gamma-Butyrolactone, Verapamil, Delta-Hexanolactone, 3,4,5-Trimethoxycinnamic acid, N-Alpha-acetyllysine, D-Arginine, 3-Cresotinic acid, Pregnenolone sulfate, 3-Methyladipic acid |
| 12w | 61 | Kaempferol, Phenylephrine, D-Pantethine, 2-Aminobenzoic acid, Alpha-Linolenic acid, m-Aminobenzoic acid, Glycerophosphocholine, 2,6-Dihydroxybenzoic acid, Caffeic acid, Fructose 6-phosphate, Adenosine monophosphate, Mannose 6-phosphate, L-Aspartyl-L-phenylalanine, Luteolin, Melibiose, D-Arabitol, DL-2-Aminooctanoic acid, L-Malic acid, Protocatechuic acid, 2-Pyrocatechuic acid, Glucose 6-phosphate, Senecioic acid, 3-Pyridylacetic acid, Phthalic acid, Cellobiose, D-Xylitol, 3-Methoxytyramine, Pregnenolone sulfate, MNH4, L-Glutamic acid, Aspirin, Trigonelline, Octadecanedioic acid, Traumatic acid, 2-Deoxyguanosine 5-monophosphate, Ribothymidine, Mannose 6-phosphate, MNa, 3,4-Dihydroxymandelic acid, Ribitol, Canrenone, Sucrose, Caprylic acid, 4-Hydroxyphenylpyruvic acid, Turanose, 2-Furoic acid, 2,4-Dihydroxybenzoic acid, 1,3-Dimethyluracil, Hematoporphyrin IX, Valproic acid, Trehalose, Alpha-Lactose, Lactulose, Malic acid, p-Aminobenzoic acid, L-Arabitol, L-Acetylcarnitine, 5-Methylthioadenosine, Isomaltose, Glucose 1-phosphate, Hypotaurine, Gentisic acid, Pregnenolone sulfate |
| Epa vs DPN | 4w | 54 | Alpha-Linolenic acid, 2-Ethyl-2-Hydroxybutyric acid, Glycerophosphocholine, 2,6-Dihydroxybenzoic acid, Beta-Alanine, Adenosine monophosphate, Citrulline, DL-2-Aminooctanoic acid, Linoleic acid, Sarcosine, Protocatechuic acid, 2-Pyrocatechuic acid, 2-Ketobutyric acid, Allantoic acid, Clotrimazole, Methylcysteine, D-Alanine, Urea, Octadecanedioic acid, Traumatic acid, 2-Deoxyguanosine 5-monophosphate, Ribothymidine, 2-Hydroxycaproic acid, FAPy-adenine, Allantoic acid, MNa, Creatine, Canrenone, Famotidine, L-Arginine, Imidazoleacetic acid, 2,4-Dihydroxybenzoic acid, Pyridoxal 5-phosphate, 3-Methylindole, 1,3-Dimethyluracil, Homocitrulline, Thymine, 5-Methoxydimethyltryptamine, Adenine, Inosine, Leucinic acid, Succinic acid semialdehyde, Trimethylamine N-oxide, Taurocholic acid, 2-Pyrrolidinone, Daidzein, 4-Chlorobenzoic acid, Glycylproline, L-Alanine, Verapamil, cis,cis-Muconic acid, D-Arginine, 2-Chlorobenzoic acid, Gentisic acid, m-Chlorobenzoic acid |
| 6w | 23 | Gluconolactone, Alpha-Linolenic acid, Deoxyguanosine, Ornithine, Retinal, L-Serine, Taurine, L-Cystathionine, Hydroxykynurenine, Myristic acid, Melatonin, PC16:016:0, Cytosine, 3b-Hydroxy-5-cholenoic acid, Dodecanedioic acid, MNH4, All-trans-retinoic acid, Adenosine, Adenine, Inosine, 13-cis-Retinoic acid, Taurocholic acid, Dodecanedioic acid, Cortisol |
| 12w | 31 | Alpha-Linolenic acid, L-Carnitine, D-Arabitol, 3-Hydroxybutyric acid, DL-2-Aminooctanoic acid, Xanthosine, Succinylacetone, MNH4, Senecioic acid, R-3-Hydroxybutyric acid, Normetanephrine, D-Xylitol, 2-Phenylaminoadenosine, Epinephrine, Ribitol, Canrenone, 2-Hydroxybutyric acid, Famotidine, L-Arginine, Succinylacetone, Benzamide, 2-Furoic acid, 1,3-Dimethyluracil, Scopolamine, Adenine, Alpha-Hydroxyisobutyric acid, L-Arabitol, 5-Hydroxylysine, Pimelic acid, D-Arginine, Hypotaurine, 3-Methyladipic acid |
| LW-l vs DPN | 4w | 139 | N-Acetyl-L-phenylalanine, Dehydroascorbic acid, Ketoleucine, 17-Hydroxyprogesterone, D-threo-Isocitric acid, Indole-3-carboxylic acid, Benzocaine, Mandelic acid, 2-Aminobenzoic acid, Alpha-Linolenic acid, m-Aminobenzoic acid, Deoxycorticosterone, N-Acetyl-L-alanine, Glycerophosphocholine, L-Threonine, Deoxyguanosine, 2,6-Dihydroxybenzoic acid, L-Homoserine, Homogentisic acid, Beta-Alanine, Caffeic acid, Fructose 6-phosphate, 3-Indolepropionic acid, L-Aspartyl-L-phenylalanine, Mannose 6-phosphate, Citrulline, Indolelactic acid, MNH4, 3-Aminosalicylic acid, Inosine triphosphate, Melibiose, D-Arabitol, 11a-Hydroxyprogesterone, DL-2-Aminooctanoic acid, Dihydrouracil, Taurine, Malonic acid, Sarcosine, Citric acid, Protocatechuic acid, L-Lysine, Uracil, Diaminopimelic acid, 2-Pyrocatechuic acid, Glucose 6-phosphate, trans-Aconitic acid, Senecioic acid, Normetanephrine, 3-Pyridylacetic acid, Methylcysteine, Guaifenesin, Cellobiose, Testosterone, D-Alanine, Glycyl-L-leucine, D-Xylitol, Urea, N-Acetylneuraminic acid, N-Methylhydantoin, 2-Phenylaminoadenosine, 1-Methyladenosine, Uridine diphosphate glucose, L-Glutamic acid, 5-Methoxytryptophol, Trigonelline, Aspirin, Triamterene, Octadecanedioic acid, Traumatic acid, Epinephrine, 3,4-Dihydroxybenzeneacetic acid, Ribothymidine, 4-Guanidinobutanoic acid, Mannose 6-phosphate, MNa, 3,4-Dihydroxymandelic acid, 1,3,7-Trimethyluric acid, FAPy-adenine, Glycine, Indolelactic acid, D-Lysine, Oxoglutaric acid, Phenylacetaldehyde, Androstanedione, MNH4, Ribitol, Uridine 5-monophosphate, Creatine, Aspartame, Dehydroepiandrosterone, Sucrose, 4-Hydroxyphenylpyruvic acid, 4-Hydroxy-3-methylbenzoic acid, 2-Methyl-3-ketovaleric acid, L-Arginine, Turanose, Ethenodeoxyadenosine, Benzamide, 2,4-Dihydroxybenzoic acid, Purine, 3-Methylindole, 1,3-Dimethyluracil, Scopolamine, Homocitrulline, Cortisone, Adenosine, p-Anisic acid, Adenine, Inosine, Cortexolone, Trehalose, Alpha-Lactose, Lactulose, Deoxyadenosine monophosphate, 5-Methoxysalicylic acid, Argininosuccinic acid, Vanillic acid, L-Arabitol, p-Aminobenzoic acid, 5-Hydroxylysine, Corticosterone, L-Acetylcarnitine, L-Alanine, Erythritol, Atenolol, Thymidine 5-triphosphate, 3-Methoxytyrosine, D-Glutamine, Deoxycorticosterone, MNH4, L-Glutamine, D-Arginine, N-Alpha-acetyllysine, 4-Hydroxyproline, 3-Cresotinic acid, Isomaltose, Glucose 1-phosphate, Hypotaurine, Gentisic acid, Androstanedione, Isocitric acid, 5-Aminolevulinic acid, L-Phenylalanine |
| 6w | 30 | Hippuric acid, 2,2-Dimethylsuccinic acid, Glycerophosphocholine, L-Aspartyl-L-phenylalanine, L-Proline, L-Serine, 3-Hydroxybutyric acid, Taurine, R-3-Hydroxybutyric acid, 2-Piperidinone, Pyrrolidonecarboxylic acid, Glutathione, Guaifenesin, 2,3-Diaminopropionic acid, 2-Methylglutaric acid, Isoxanthopterin, Indole-3-carbinol, Methylglutaric acid, Pyroglutamic acid, 2-Hydroxybutyric acid, Dimethyl sulfone, Monomethyl glutaric acid, Cortisone, Tryptophanol, Adenine, Alpha-Hydroxyisobutyric acid, L-Acetylcarnitine, Verapamil, 3,4,5-Trimethoxycinnamic acid, L-Methionine |
| 12w | 65 | Ketoleucine, Indole-3-carboxylic acid, Mandelic acid, Alpha-Linolenic acid, Glycerophosphocholine, L-Fucose, Caffeic acid, Fructose 6-phosphate, Mannose 6-phosphate, Citrulline, Glycocholic acid, Indolelactic acid, MNH4, Inosine triphosphate, Melibiose, 3-Hydroxybutyric acid, D-Arabitol, DL-2-Aminooctanoic acid, L-Cystathionine, Carnosine, Glucose 6-phosphate, R-3-Hydroxybutyric acid, Phthalic acid, Cellobiose, D-Xylitol, L-Glutamic acid, Aspirin, Octadecanedioic acid, Mannose 6-phosphate, MNa, 7-Ketocholesterol, Indolelactic acid, Glycerol 3-phosphate, Ribitol, Canrenone, Adenosine 2,3-cyclic phosphate, Sucrose, Indole-3-carbinol, 2-Hydroxybutyric acid, 4-Hydroxyphenylpyruvic acid, 4-Hydroxy-3-methylbenzoic acid, Trimethylamine, L-Arginine, 2-Methyl-3-ketovaleric acid, Turanose, 2-Furoic acid, N-Methylnicotinamide, p-Anisic acid, Trehalose, Alpha-Hydroxyisobutyric acid, Alpha-Lactose, 5-Phenylvaleric acid, Lactulose, Cyclic AMP, Butyric acid, Glycylproline, Guanosine triphosphate, L-Arabitol, 5-Hydroxylysine, 3-Methoxytyrosine, 3,4,5-Trimethoxycinnamic acid, D-Arginine, 5-Methylthioadenosine, 3-Cresotinic acid, Isomaltose, Glucose 1-phosphate, Rhamnose |
| LW-m vs DPN | 4w | 61 | Dehydroascorbic acid, Kaempferol, Acetylglycine, Indole-3-carboxylic acid, Mandelic acid, Alpha-Linolenic acid, Glycerophosphocholine, 2,6-Dihydroxybenzoic acid, L-Carnitine, Beta-Alanine, 3-Indolepropionic acid, Retinal, L-Aspartyl-L-phenylalanine, Citrulline, Indolelactic acid, MNH4, dGTP, Luteolin, Melibiose, DL-2-Aminooctanoic acid, Theobromine, Sarcosine, Protocatechuic acid, Uracil, 2-Pyrocatechuic acid, trans-Aconitic acid, Phthalic acid, Cellobiose, D-Alanine, Capric acid, Guaiacol, 4-Methylcatechol, 3,4-Dihydroxymandelic acid, Indolelactic acid, Oxoglutaric acid, Riboflavin, Canrenone, Sucrose, Orotic acid, 4-Hydroxy-3-methylbenzoic acid, L-Arginine, Turanose, 2,4-Dihydroxybenzoic acid, Purine, 1,3-Dimethyluracil, Homocitrulline, Cortisone, p-Anisic acid, 5-Methoxydimethyltryptamine, Trehalose, Alpha-Lactose, Lactulose, Guanosine triphosphate, L-Acetylcarnitine, L-Alanine, Niacinamide, 3-Methoxytyrosine, D-Arginine, 3-Cresotinic acid, Adenosine triphosphate, Isomaltose, Gentisic acid |
| 6w | 24 | Alpha-Linolenic acid, 2,2-Dimethylsuccinic acid, Glycerophosphocholine, Deoxyguanosine, Retinal, L-Aspartyl-L-phenylalanine, L-Proline, 2-Isopropylmalic acid, MNH4, 2-Amino-3-phosphonopropionic acid, Senecioic acid, Hydroxyphenyllactic acid, PC16:016:0, Epicatechin, 2-Methylglutaric acid, Medroxyprogesterone, Methylglutaric acid, Monomethyl glutaric acid, Homovanillic acid, 2-Isopropylmalic acid, Adenosine, Taurocholic acid, L-Acetylcarnitine, Verapamil, L-Methionine |
| 12w | 57 | D-Alpha-aminobutyric acid, Phloretin, Indole-3-carboxylic acid, Gamma-Aminobutyric acid, Mandelic acid, 2-Aminobenzoic acid, Alpha-Linolenic acid, Inosinic acid, Dimethylglycine, m-Aminobenzoic acid, L-Threonine, L-Homoserine, Caffeic acid, Fructose 6-phosphate, Mannose 6-phosphate, Citrulline, DL-2-Aminooctanoic acid, L-Cystathionine, Pantothenic acid, Diaminopimelic acid, Glucose 6-phosphate, Allantoic acid, Mevalonic acid, Normetanephrine, 3-Pyridylacetic acid, Phthalic acid, L-Glutamic acid, Trigonelline, Aspirin, Epinephrine, Mannose 6-phosphate, MNa, 7-Ketocholesterol, Shikimic acid, Oxoglutaric acid, Allantoic acid, MNa, 2,4-Diamino-6-hydroxypyrimidine, Uridine 5-monophosphate, Aspartame, Ureidosuccinic acid, Acetylcysteine, 4-Hydroxyphenylpyruvic acid, 4-Hydroxy-3-methylbenzoic acid, Trimethylamine, 2-Furoic acid, 3-Aminoisobutanoic acid, Methylguanidine, N-Methylnicotinamide, p-Anisic acid, Hematoporphyrin IX, p-Aminobenzoic acid, 5-Hydroxylysine, L-Alpha-aminobutyric acid, L-Acetylcarnitine, Pimelic acid, 3-Cresotinic acid, Glucose 1-phosphate, 3-Methyladipic acid |
| LW-h vs DPN | 4w | 67 | Indole-3-carboxylic acid, Hippuric acid, Mandelic acid, Creatinine, N-Acetylglutamic acid, Alpha-Linolenic acid, N-Acetyl-L-alanine, 2,6-Dihydroxybenzoic acid, Beta-Alanine, Caffeic acid, Adenosine monophosphate, Fructose 6-phosphate, 3-Indolepropionic acid, Retinal, Mannose 6-phosphate, L-Tyrosine, Diethanolamine, D-Arabitol, DL-2-Aminooctanoic acid, Malonic acid, Linoleic acid, Sarcosine, Protocatechuic acid, Pantothenic acid, Uracil, 2-Pyrocatechuic acid, Glucose 6-phosphate, Senecioic acid, Phthalic acid, D-Alanine, D-Xylitol, 2-Phenylaminoadenosine, 5-Methoxytryptophol, Aspirin, Octadecanedioic acid, Traumatic acid, 2-Deoxyguanosine 5-monophosphate, Mannose 6-phosphate, MNa, 3,4-Dihydroxymandelic acid, 7-Ketocholesterol, FAPy-adenine, Shikimic acid, Riboflavin, Isoxanthopterin, Ribitol, Canrenone, 4-Hydroxyphenylpyruvic acid, 4-Hydroxy-3-methylbenzoic acid, L-Arginine, 2,4-Dihydroxybenzoic acid, 3-Methylindole, Cortisone, N-Methylnicotinamide, p-Anisic acid, Adenine, Taurocholic acid, L-Arabitol, L-Acetylcarnitine, L-Alanine, 4-Hydroxyproline, D-Arginine, 5-Methylthioadenosine, o-Tyrosine, 3-Cresotinic acid, Glucose 1-phosphate, Gentisic acid, 5-Aminolevulinic acid |
| 6w | 26 | Alpha-Linolenic acid, Ibuprofen, Ribonolactone, Glycerophosphocholine, Deoxyguanosine, Ornithine, Retinal, Oxoadipic acid, L-Proline, L-Serine, L-Cystathionine, 2-Piperidinone, 1,11-Undecanedicarboxylic acid, PC16:016:0, Epicatechin, 2,3-Diaminopropionic acid, 3,4-Dihydroxymandelic acid, Isoxanthopterin, Medroxyprogesterone, Canrenone, Trimethylamine, All-trans-retinoic acid, Adenosine, 13-cis-Retinoic acid, Taurocholic acid, Mesoporphyrin IX |
| 12w | 53 | 17-Hydroxyprogesterone, Mandelic acid, Deoxycorticosterone, L-Carnitine, L-Fucose, Caffeic acid, Fructose 6-phosphate, Adenosine monophosphate, Mannose 6-phosphate, Indolelactic acid, MNH4, D-Arabitol, 3-Hydroxybutyric acid, 11a-Hydroxyprogesterone, DL-2-Aminooctanoic acid, Linoleic acid, 2-Phenylglycine, Glucose 6-phosphate, R-3-Hydroxybutyric acid, Mevalonic acid, Normetanephrine, Acetaminophen, Guaifenesin, D-Xylitol, L-Glutamic acid, Aspirin, 2-Deoxyguanosine 5-monophosphate, Epinephrine, Mannose 6-phosphate, MNa, 7-Ketocholesterol, Indolelactic acid, Shikimic acid, Glycerol 3-phosphate, Riboflavin, Ribitol, 2-Hydroxybutyric acid, 4-Hydroxyphenylpyruvic acid, 4-Hydroxy-3-methylbenzoic acid, L-Arginine, Benzamide, Purine, p-Anisic acid, 5-Methoxydimethyltryptamine, Alpha-Hydroxyisobutyric acid, L-Arabitol, 5-Hydroxylysine, Indoleacrylic acid, Pimelic acid, Deoxycorticosterone, MNH4, D-Arginine, 3-Cresotinic acid, Glucose 1-phosphate, 3-Methyladipic acid, Rhamnose |

**Supply Table 10** **The potential biomarkers related to MD, Epa and LWLB**

| Groups | | Cycle | Number | Potential biomarkers |
| --- | --- | --- | --- | --- |
| MD | (Con vs DPN) vs (DPN vs MD) | 4w | 26 | Alpha-Linolenic acid, N-Acetyl-L-alanine, Fructose 6-phosphate, Adenosine monophosphate, Mannose 6-phosphate, DL-2-Aminooctanoic acid, Taurine,2-Amino-3-phosphonopropionic acid,Glucose 6-phosphate, Capric acid, L-Glutamic acid, 2-Deoxyguanosine 5-monophosphate, Mannose 6-phosphate, MNa, Uridine 5-monophosphate, Canrenone, Ureidosuccinic acid, L-Arginine, 2-Furoic acid, Suberic acid, Homocitrulline, N-Methylnicotinamide, Adenine, D-Arginine, 4-Hydroxyproline, Glucose 1-phosphate, 5-Aminolevulinic acid |
| 6w | 30 | N-Acetyl-L-phenylalanine, D-Ribose 5-phosphate, MNa, Alpha-Linolenic acid, L-Carnitine, Adenosine monophosphate, 3-Indolepropionic acid, Oxoadipic acid, Citrulline, Cytidine triphosphate, Taurine, D-Ribose 5-phosphate, 2-Amino-3-phosphonopropionic acid, Clotrimazole, Glycyl-L-leucine, Capric acid, 2-Deoxyguanosine 5-monophosphate, Canrenone, L-Arginine, Imidazoleacetic acid, Suberic acid, 1,3-Dimethyluracil, Thymine, Cortexolone, Trimethylamine N-oxide, Corticosterone, Indoleacrylic acid, Erythritol, 3,4,5-Trimethoxycinnamic acid, D-Arginine, N-Alpha-acetyllysine |
| 12w | 23 | Alpha-Linolenic acid, Fructose 6-phosphate, Adenosine monophosphate, Mannose 6-phosphate, Melibiose, DL-2-Aminooctanoic acid, L-Malic acid, Glucose 6-phosphate, Cellobiose, L-Glutamic acid, 2-Deoxyguanosine 5-monophosphate, Mannose 6-phosphate, MNa, Canrenone, Sucrose, Turanose, 2-Furoic acid, 1,3-Dimethyluracil, Trehalose, Alpha-Lactose, Lactulose, Malic acid, Isomaltose, Glucose 1-phosphate |
| Epa | (Con vs DPN) vs (DPN vs Epa) | 4w | 21 | Alpha-Linolenic acid, 2-Ethyl-2-Hydroxybutyric acid, Adenosine monophosphate, Citrulline, DL-2-Aminooctanoic acid, Clotrimazole, 2-Deoxyguanosine 5-monophosphate, 2-Hydroxycaproic acid, Creatine, Canrenone, L-Arginine, Imidazoleacetic acid, 3-Methylindole, 1,3-Dimethyluracil, Homocitrulline, Thymine, Adenine, Leucinic acid, Trimethylamine N-oxide, cis,cis-Muconic acid, D-Arginine |
| 6w | 1 | Taurocholic acid |
| 12w | 14 | Alpha-Linolenic acid, L-Carnitine, DL-2-Aminooctanoic acid, Succinylacetone, MNH4, Normetanephrine, Epinephrine, Canrenone, Succinylacetone, L-Arginine, 2-Furoic acid, 1,3-Dimethyluracil, Adenine, 5-Hydroxylysine, D-Arginine |
| LW-l | (Con vs DPN) vs (DPN vs LW-l) | 4w | 50 | N-Acetyl-L-phenylalanine, Alpha-Linolenic acid, N-Acetyl-L-alanine, Fructose 6-phosphate, 3-Indolepropionic acid, Mannose 6-phosphate, Citrulline, Melibiose, DL-2-Aminooctanoic acid, Taurine, Diaminopimelic acid, Glucose 6-phosphate, Normetanephrine, Cellobiose, Testosterone, Glycyl-L-leucine, 1-Methyladenosine, L-Glutamic acid, Epinephrine, Mannose 6-phosphate, MNa, Glycine, Oxoglutaric acid, Androstanedione, MNH4, Uridine 5-monophosphate, Creatine, Aspartame, Dehydroepiandrosterone, Sucrose, L-Arginine, Turanose, 3-Methylindole, 1,3-Dimethyluracil, Homocitrulline, Cortisone, Adenine, Cortexolone, Trehalose, Alpha-Lactose, Lactulose, 5-Hydroxylysine, Corticosterone, Erythritol, 3-Methoxytyrosine, D-Arginine, 4-Hydroxyproline, N-Alpha-acetyllysine, Isomaltose, Glucose 1-phosphate, Androstanedione, 5-Aminolevulinic acid |
| 6w | 4 | L-Aspartyl-L-phenylalanine, Glutathione, L-Acetylcarnitine, Verapamil |
| 12w | 26 | Alpha-Linolenic acid, Fructose 6-phosphate, Mannose 6-phosphate, Citrulline, Melibiose, DL-2-Aminooctanoic acid, Glucose 6-phosphate, Cellobiose, L-Glutamic acid, Mannose 6-phosphate, MNa, Canrenone, Sucrose, L-Arginine, Trimethylamine, Turanose, 2-Furoic acid, N-Methylnicotinamide, Trehalose, Alpha-Lactose, Lactulose, 5-Hydroxylysine, 3-Methoxytyrosine, 3,4,5-Trimethoxycinnamic acid, D-Arginine, Isomaltose, Glucose 1-phosphate |
| LW-m | (Con vs DPN) vs (DPN vs LW-m) | 4w | 23 | Alpha-Linolenic acid, L-Carnitine, 3-Indolepropionic acid, Citrulline, Melibiose, DL-2-Aminooctanoic acid, Cellobiose, Capric acid, Oxoglutaric acid, Canrenone, Sucrose, L-Arginine, Turanose, 1,3-Dimethyluracil, Homocitrulline, Cortisone, Trehalose, Alpha-Lactose, Lactulose, Niacinamide, 3-Methoxytyrosine, D-Arginine, Isomaltose |
| 6w | 4 | L-Aspartyl-L-phenylalanine, Taurocholic acid, L-Acetylcarnitine, Verapamil |
| 12w | 22 | Phloretin, Alpha-Linolenic acid, Fructose 6-phosphate, Mannose 6-phosphate, Citrulline, DL-2-Aminooctanoic acid, Pantothenic acid, Diaminopimelic acid, Glucose 6-phosphate, Normetanephrine, L-Glutamic acid, Epinephrine, Mannose 6-phosphate, MNa, Oxoglutaric acid, Uridine 5-monophosphate, Aspartame, Ureidosuccinic acid, Trimethylamine, 2-Furoic acid, N-Methylnicotinamide, 5-Hydroxylysine, Glucose 1-phosphate |
| LW-h | (Con vs DPN) vs (DPN vs LW-h) | 4w | 24 | Creatinine, Alpha-Linolenic acid, N-Acetyl-L-alanine, Fructose 6-phosphate, Adenosine monophosphate, 3-Indolepropionic acid, Mannose 6-phosphate, L-Tyrosine, DL-2-Aminooctanoic acid, Pantothenic acid, Glucose 6-phosphate, 2-Deoxyguanosine 5-monophosphate, Mannose 6-phosphate, MNa, Canrenone, L-Arginine, 3-Methylindole, Cortisone, N-Methylnicotinamide, Adenine, D-Arginine, 4-Hydroxyproline, o-Tyrosine, Glucose 1-phosphate, 5-Aminolevulinic acid |
| 6w | 1 | Taurocholic acid |
| 12w | 16 | L-Carnitine, Fructose 6-phosphate, Adenosine monophosphate, Mannose 6-phosphate, DL-2-Aminooctanoic acid, Glucose 6-phosphate, Normetanephrine, L-Glutamic acid, Epinephrine, 2-Deoxyguanosine 5-monophosphate, Mannose 6-phosphate, MNa, L-Arginine, 5-Hydroxylysine, Indoleacrylic acid, D-Arginine, Glucose 1-phosphate |

**Supply Table 11 The pathway analysis of LWLB Granules in LW-l, LW-m and LW-h groups**

| Groups | The name of pathway | P-value | Log P-value |
| --- | --- | --- | --- |
| LW-l | Starch and sucrose metabolism | 5.76E-08 | 7.2393 |
| Arginine biosynthesis | 0.00017342 | 3.7609 |
| Galactose metabolism | 0.0013055 | 2.8842 |
| Amino sugar and nucleotide sugar metabolism | 0.0032978 | 2.4818 |
| Neomycin, kanamycin and gentamicin biosynthesis | 0.017195 | 1.7646 |
| D-Arginine and D-ornithine metabolism | 0.034118 | 1.467 |
| Arginine and proline metabolism | 0.040595 | 1.3915 |
| Nitrogen metabolism | 0.05077 | 1.2944 |
| D-Glutamine and D-glutamate metabolism | 0.05077 | 1.2944 |
| Aminoacyl-tRNA biosynthesis | 0.062048 | 1.2073 |
| alpha-Linolenic acid metabolism | 0.10699 | 0.97065 |
| Butanoate metabolism | 0.12248 | 0.91194 |
| Histidine metabolism | 0.13013 | 0.88562 |
| Pentose and glucuronate interconversions | 0.14525 | 0.83789 |
| Fructose and mannose metabolism | 0.14525 | 0.83789 |
| Lysine degradation | 0.19627 | 0.70714 |
| Glycolysis / Gluconeogenesis | 0.20333 | 0.69181 |
| Glutathione metabolism | 0.21727 | 0.66301 |
| Alanine, aspartate and glutamate metabolism | 0.21727 | 0.66301 |
| Inositol phosphate metabolism | 0.23098 | 0.63643 |
| Porphyrin and chlorophyll metabolism | 0.23098 | 0.63643 |
| Glyoxylate and dicarboxylate metabolism | 0.24447 | 0.61177 |
| Biosynthesis of unsaturated fatty acids | 0.2708 | 0.56735 |
| LW-m | Arginine biosynthesis | 0.00023962 | 3.6205 |
| D-Glutamine and D-glutamate metabolism | 0.011913 | 1.924 |
| alpha-Linolenic acid metabolism | 0.02569 | 1.5902 |
| Butanoate metabolism | 0.029603 | 1.5287 |
| Citrate cycle (TCA cycle) | 0.03934 | 1.4052 |
| Alanine, aspartate and glutamate metabolism | 0.054782 | 1.2614 |
| Biosynthesis of unsaturated fatty acids | 0.070058 | 1.1545 |
| LW-h | Starch and sucrose metabolism | 2.74E-05 | 4.5628 |
| Amino sugar and nucleotide sugar metabolism | 0.00044703 | 3.3497 |
| Neomycin, kanamycin and gentamicin biosynthesis | 0.0092776 | 2.0326 |
| D-Arginine and D-ornithine metabolism | 0.018481 | 1.7333 |
| Arginine biosynthesis | 0.063409 | 1.1978 |
| Pentose and glucuronate interconversions | 0.08088 | 1.0922 |
| Fructose and mannose metabolism | 0.08088 | 1.0922 |
| Glycolysis / Gluconeogenesis | 0.11499 | 0.93936 |
| Galactose metabolism | 0.11917 | 0.92383 |
| Inositol phosphate metabolism | 0.13163 | 0.88065 |
| Arginine and proline metabolism | 0.16411 | 0.78487 |
| Aminoacyl-tRNA biosynthesis | 0.20324 | 0.69199 |
| Purine metabolism | 0.26973 | 0.56907 |
